# Supplementary material for: Opposing Roles of FoxA1 and FoxA3 in Intrahepatic Cholangiocarcinoma Progression
Source: PubMed Central journal article supplement (PMC7084256; doi:10.3390/ijms21051796), 2020-03-05
Supplement: ijms-21-01796-s001.pdf [file ijms-21-01796-s001.pdf]

Figure S1

S1A

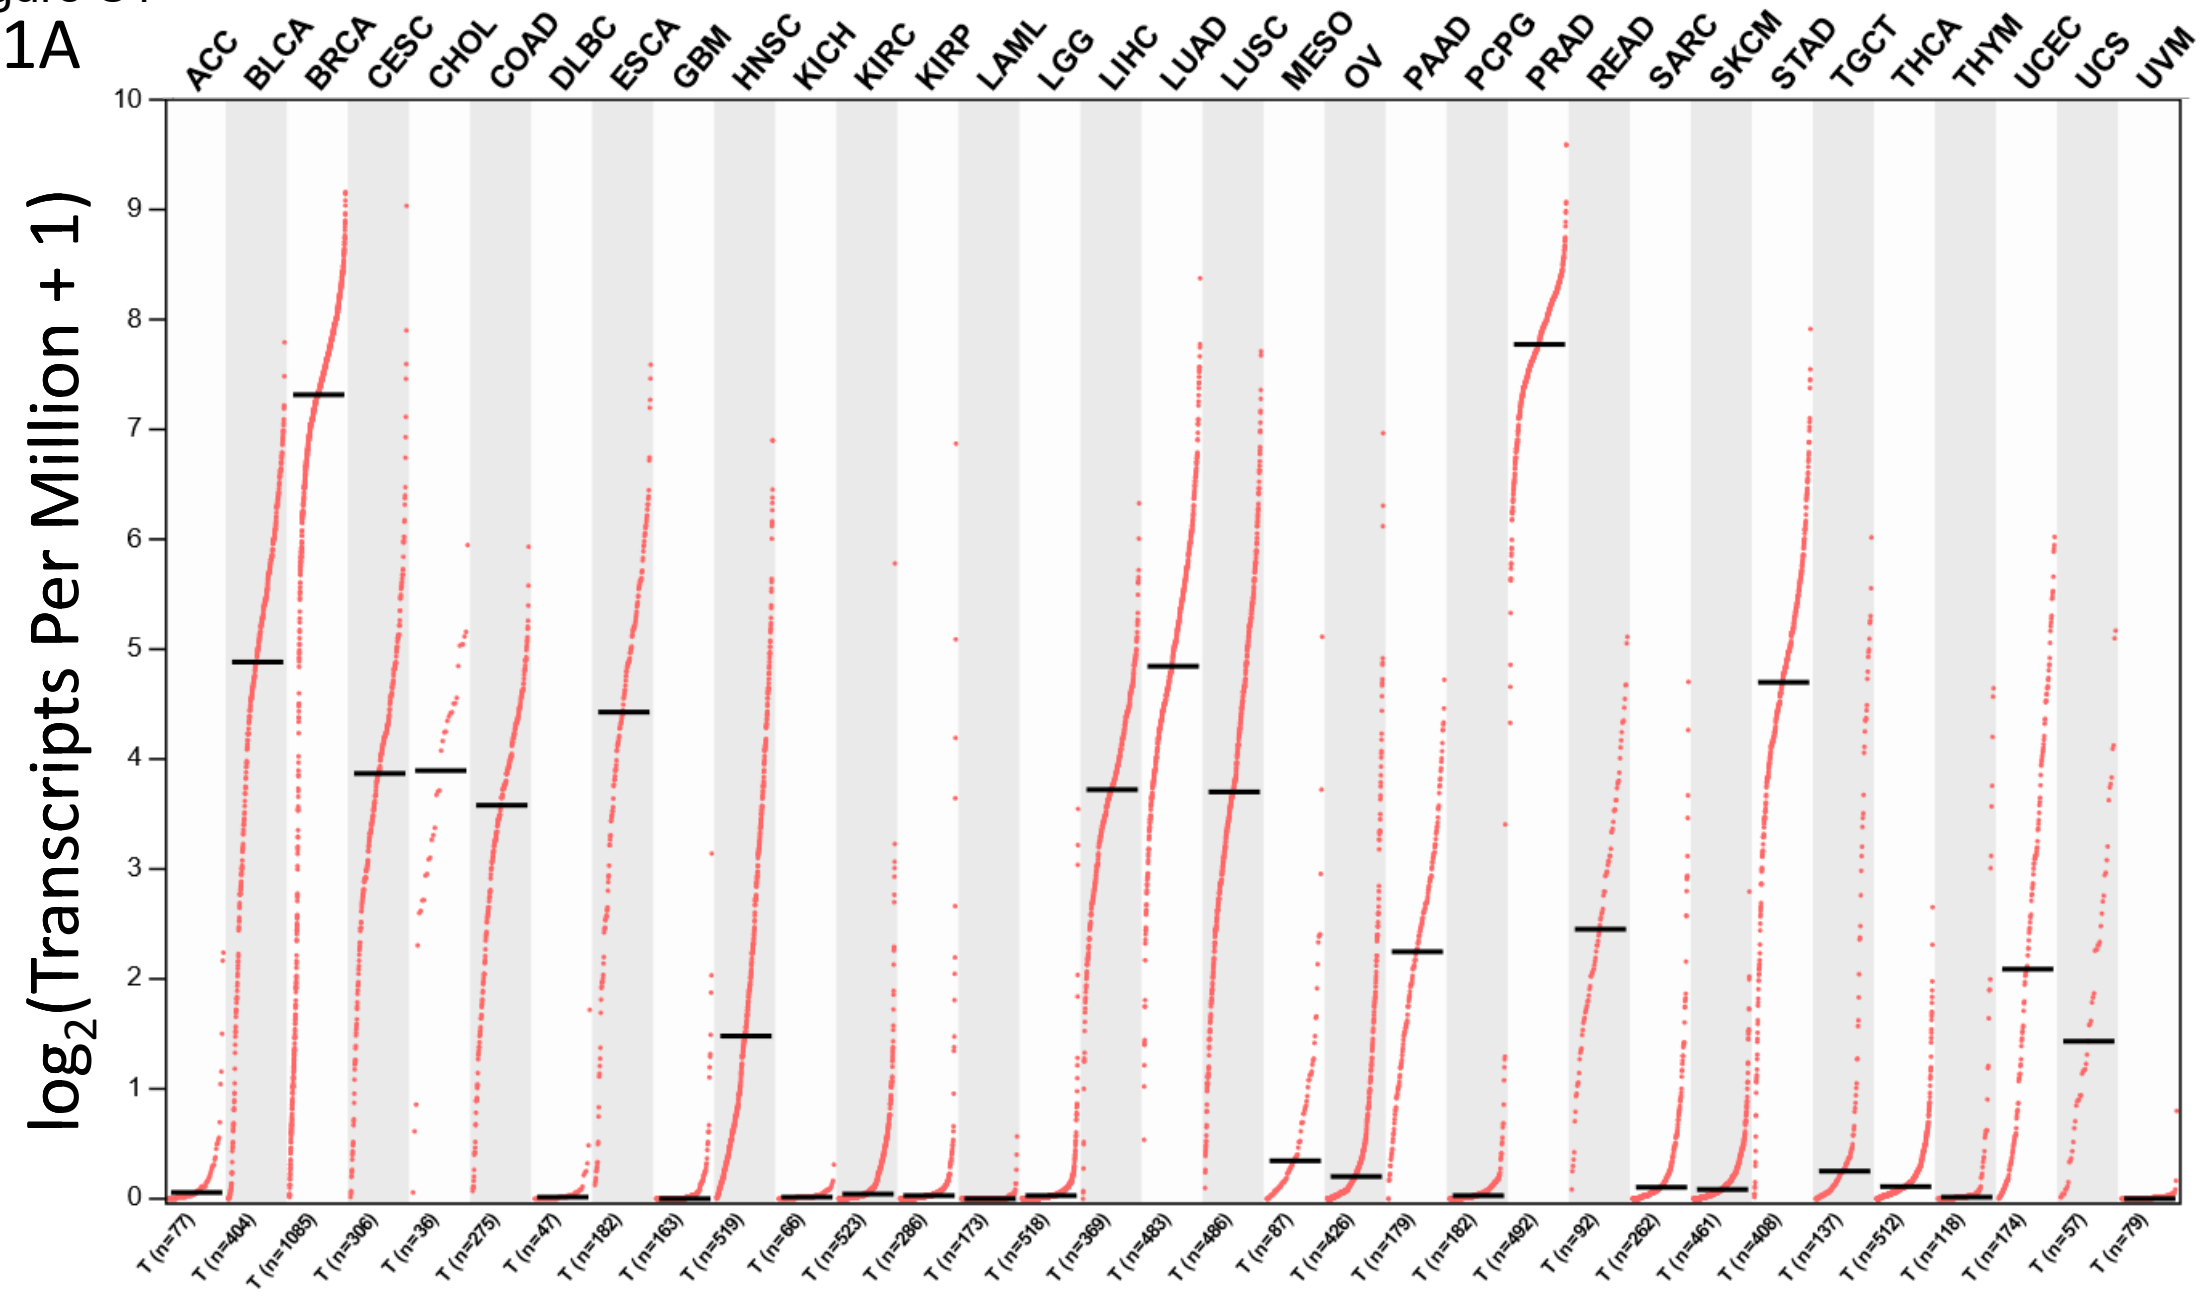

Figure S1

S1B

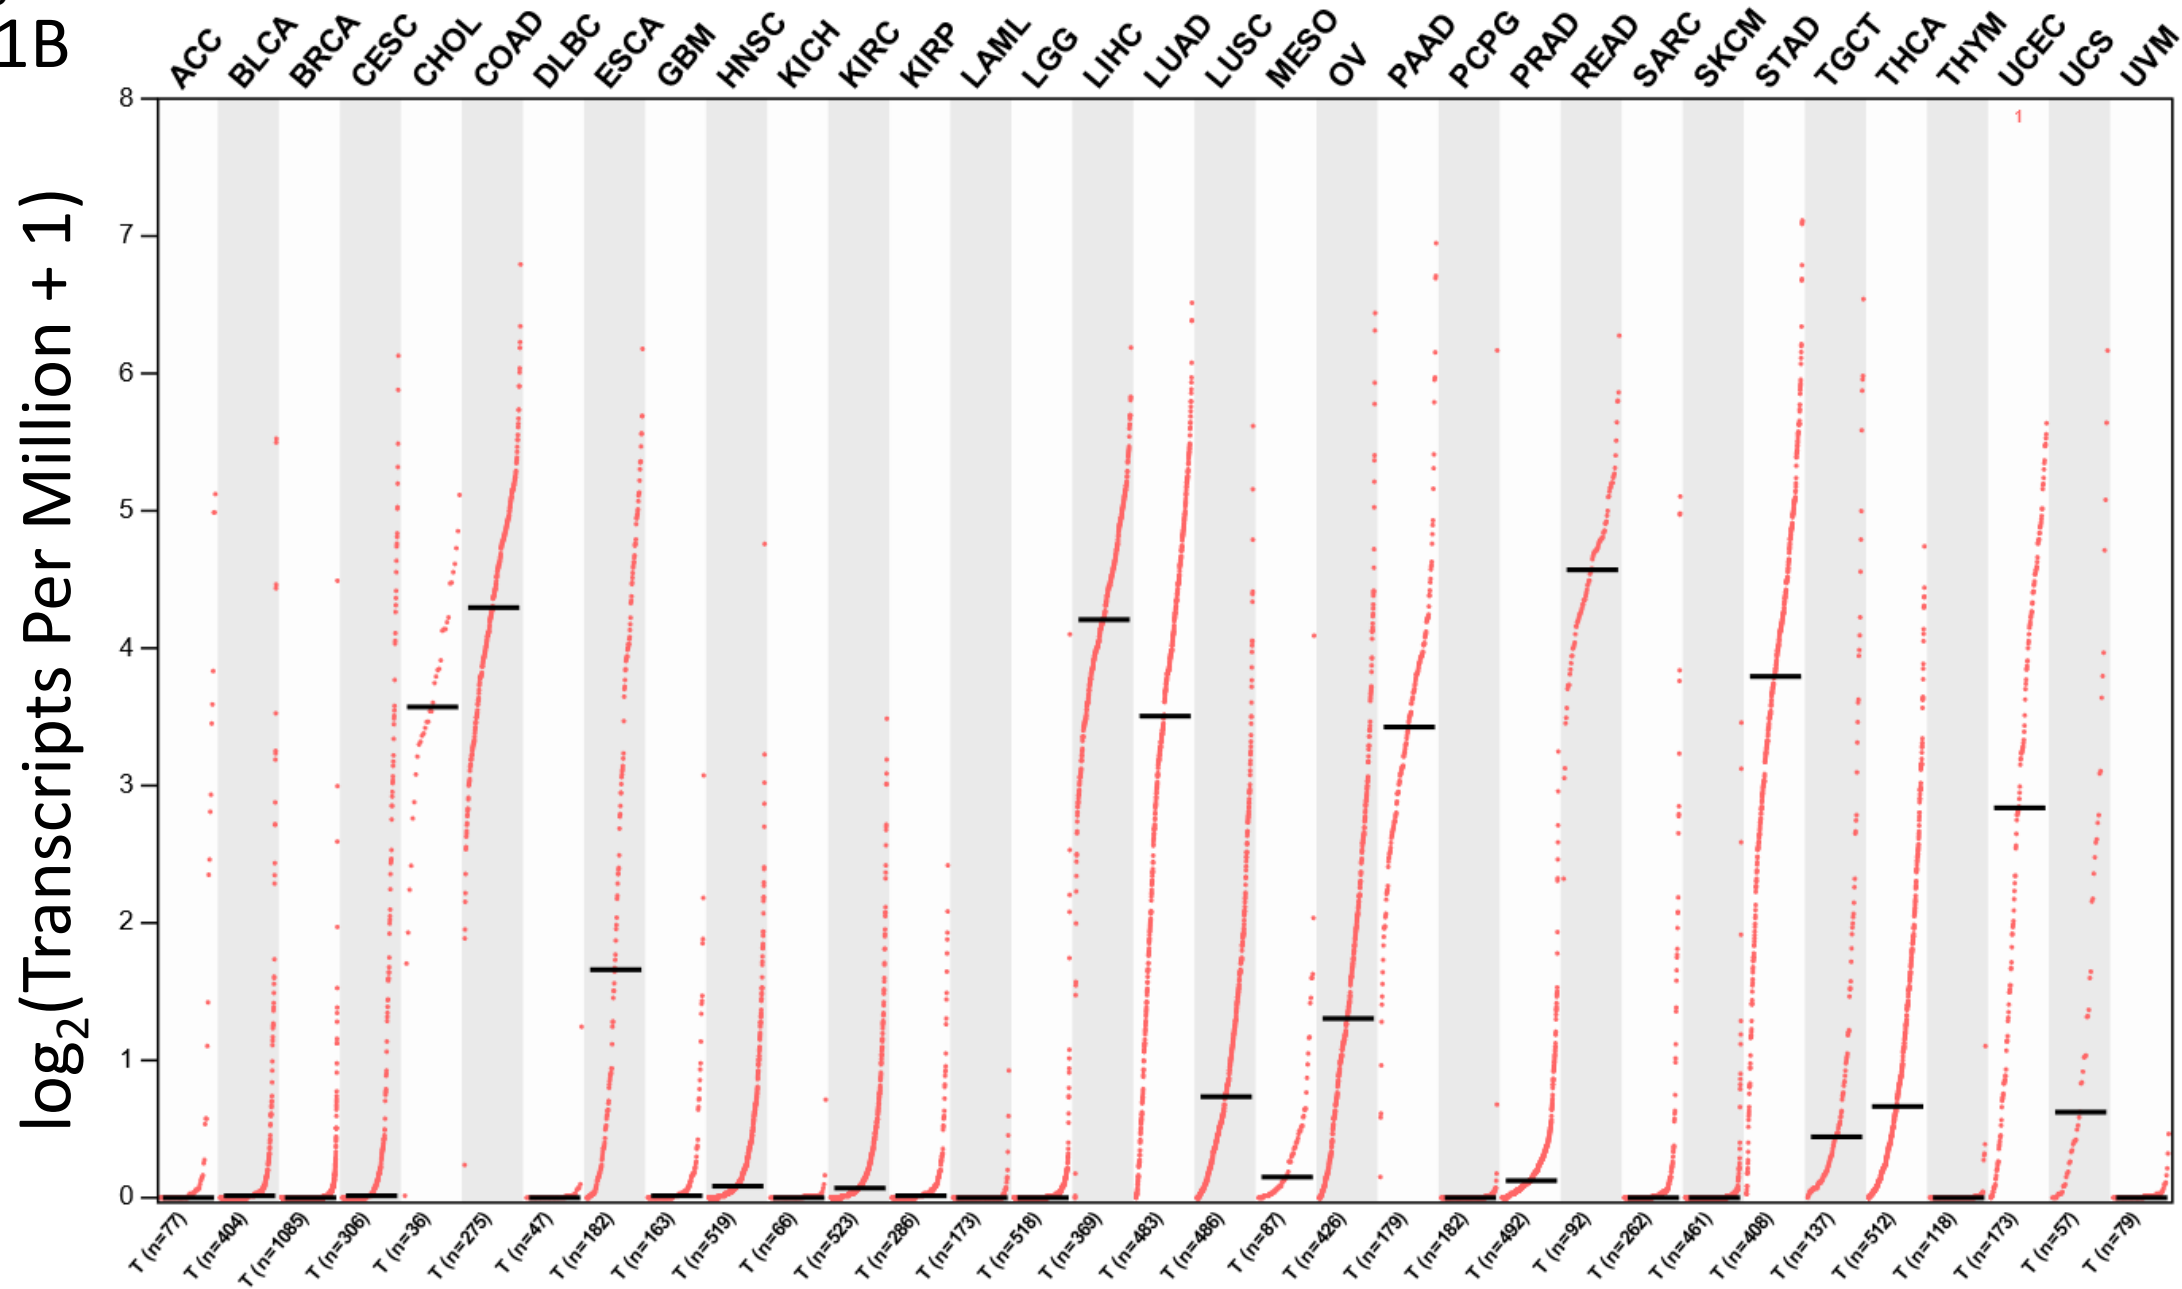

Figure S1

S1C

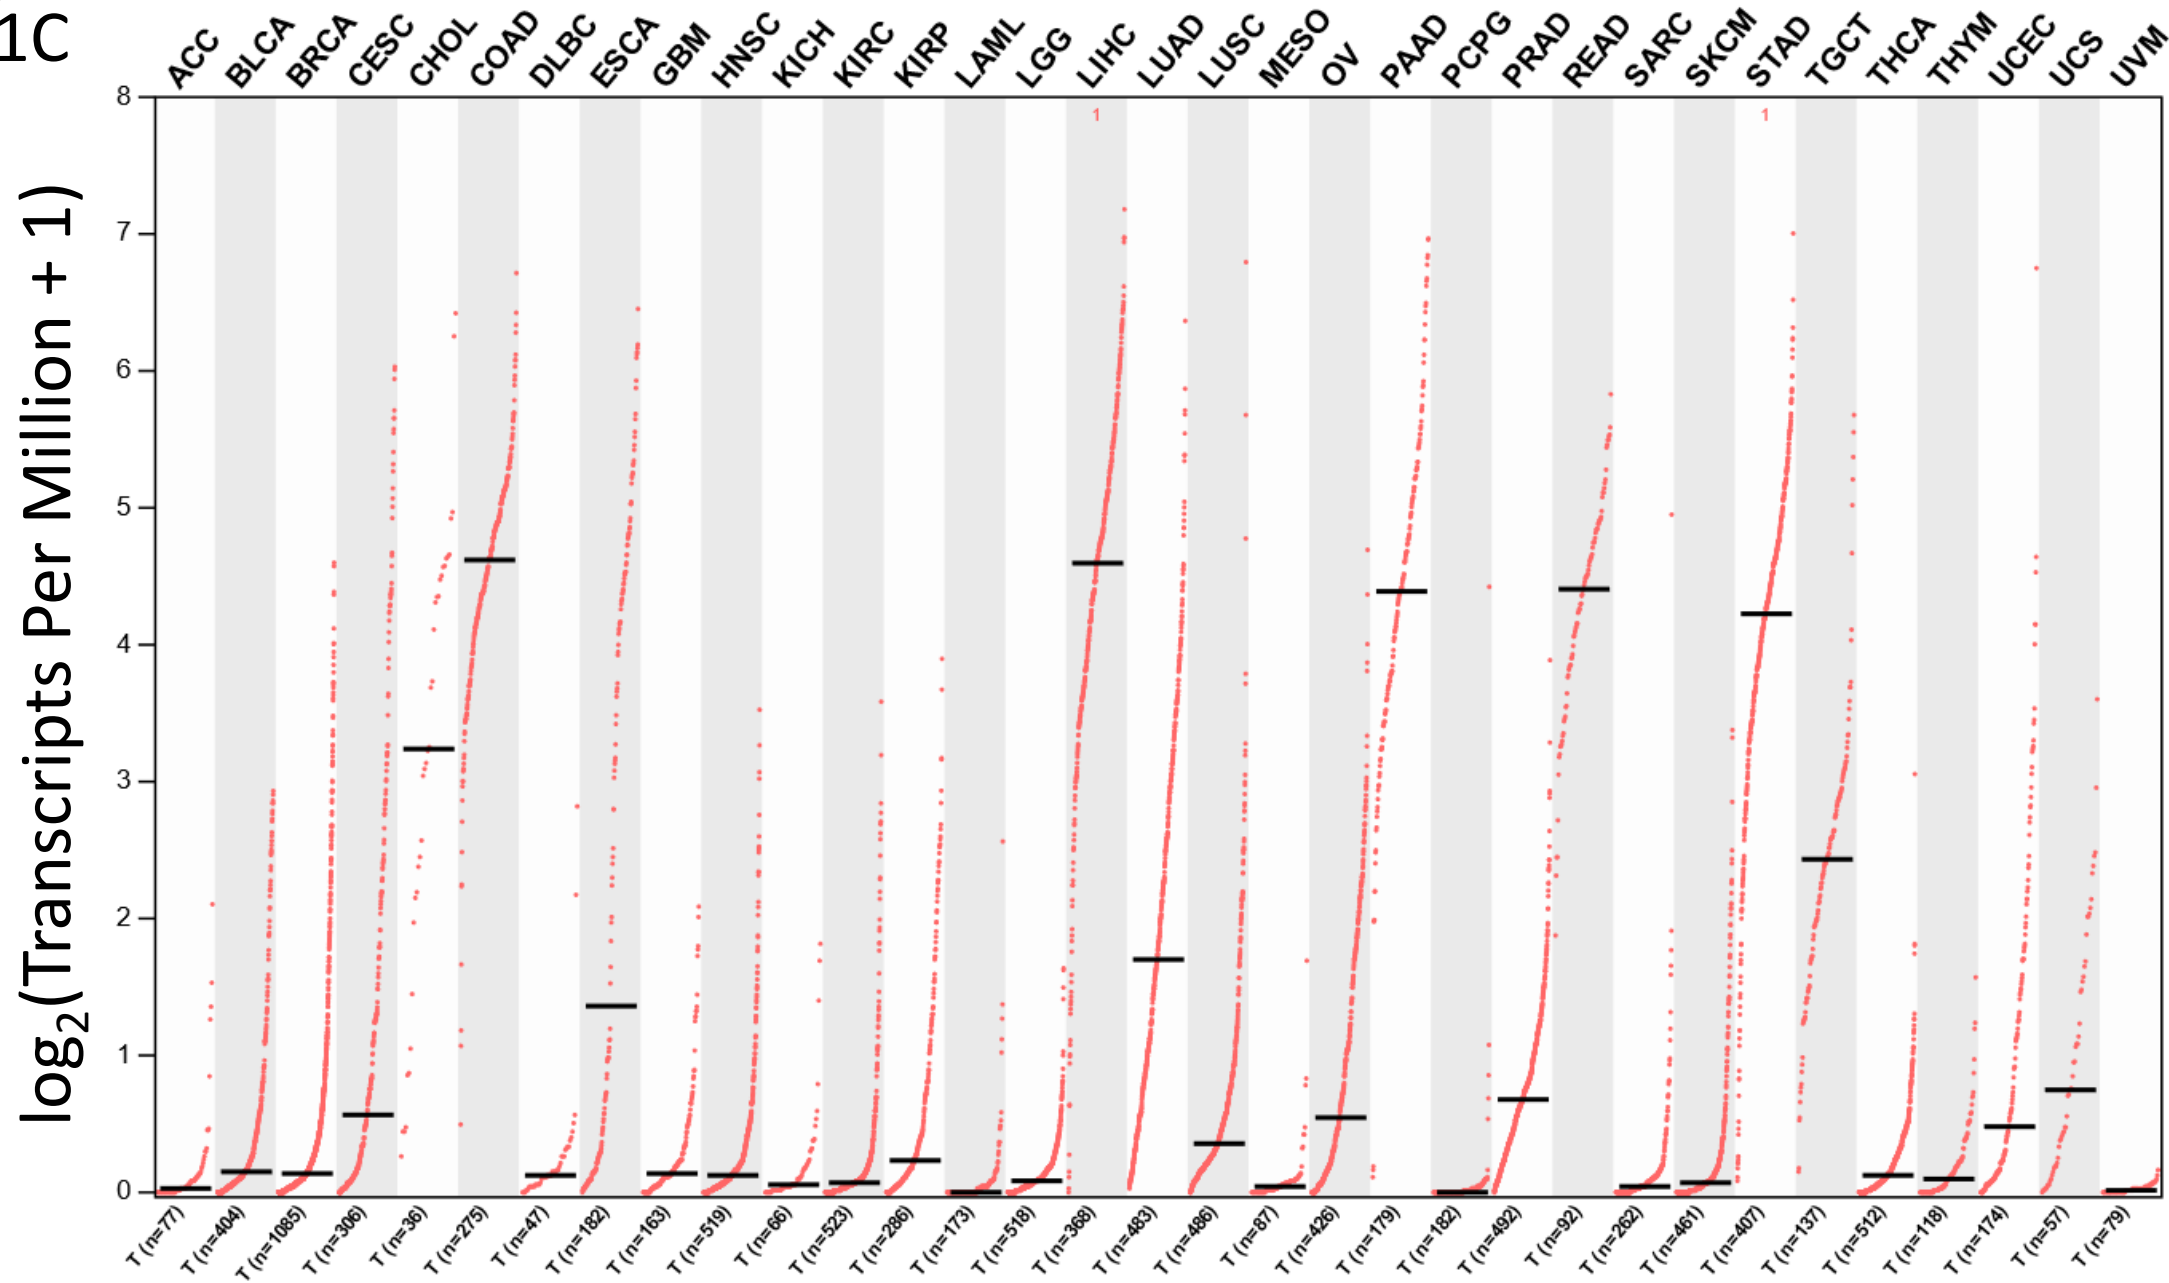

**Table S1 Cancer types used in analysis of TCGA database**

| <b>TCGA</b> | <b>Detail</b>                                                    |
|-------------|------------------------------------------------------------------|
| ACC         | Adrenocortical carcinoma                                         |
| BLCA        | Bladder Urothelial Carcinoma                                     |
| BRCA        | Breast invasive carcinoma                                        |
| CESC        | Cervical squamous cell carcinoma and endocervical adenocarcinoma |
| CHOL        | Cholangio carcinoma                                              |
| COAD        | Colon adenocarcinoma                                             |
| DLBC        | Lymphoid Neoplasm Diffuse Large B-cell Lymphoma                  |
| ESCA        | Esophageal carcinoma                                             |
| GBM         | Glioblastoma multiforme                                          |
| HNSC        | Head and Neck squamous cell carcinoma                            |
| KICH        | Kidney Chromophobe                                               |
| KIRC        | Kidney renal clear cell carcinoma                                |
| KIRP        | Kidney renal papillary cell carcinoma                            |
| LAML        | Acute Myeloid Leukemia                                           |
| LGG         | Brain Lower Grade Glioma                                         |
| LIHC        | Liver hepatocellular carcinoma                                   |
| LUAD        | Lung adenocarcinoma                                              |
| LUSC        | Lung squamous cell carcinoma                                     |
| MESO        | Mesothelioma                                                     |
| OV          | Ovarian serous cystadenocarcinoma                                |
| PAAD        | Pancreatic adenocarcinoma                                        |
| PCPG        | Pheochromocytoma and Paraganglioma                               |
| PRAD        | Prostate adenocarcinoma                                          |
| READ        | Rectum adenocarcinoma                                            |
| SARC        | Sarcoma                                                          |
| SKCM        | Skin Cutaneous Melanoma                                          |
| STAD        | Stomach adenocarcinoma                                           |
| TGCT        | Testicular Germ Cell Tumors                                      |
| THCA        | Thyroid carcinoma                                                |
| THYM        | Thymoma                                                          |
| UCEC        | Uterine Corpus Endometrial Carcinoma                             |
| UCS         | Uterine Carcinosarcoma                                           |
| UVM         | Uveal Melanoma                                                   |

| <b>Number of tumor sample</b> |
|-------------------------------|
| 77                            |
| 404                           |
| 1085                          |
| 306                           |
| 36                            |
| 275                           |
| 47                            |
| 182                           |
| 163                           |
| 519                           |
| 66                            |
| 523                           |
| 286                           |
| 173                           |
| 518                           |
| 369                           |
| 483                           |
| 486                           |
| 87                            |
| 426                           |
| 179                           |
| 182                           |
| 492                           |
| 92                            |
| 262                           |
| 461                           |
| 408                           |
| 137                           |
| 512                           |
| 118                           |
| 174                           |
| 57                            |
| 79                            |
